# Supplementary material for: Martensitic transition, spin glass behavior and enhanced exchange bias in Si substituted Ni50Mn36Sn14 Heusler alloys
Source: Royal Society of Chemistry journal article supplement (doi:10.1039/c6ra01484d), 2016-01-01
Supplement: c6ra01484d1.pdf [file c6ra01484d1.pdf]

## Supplementary information

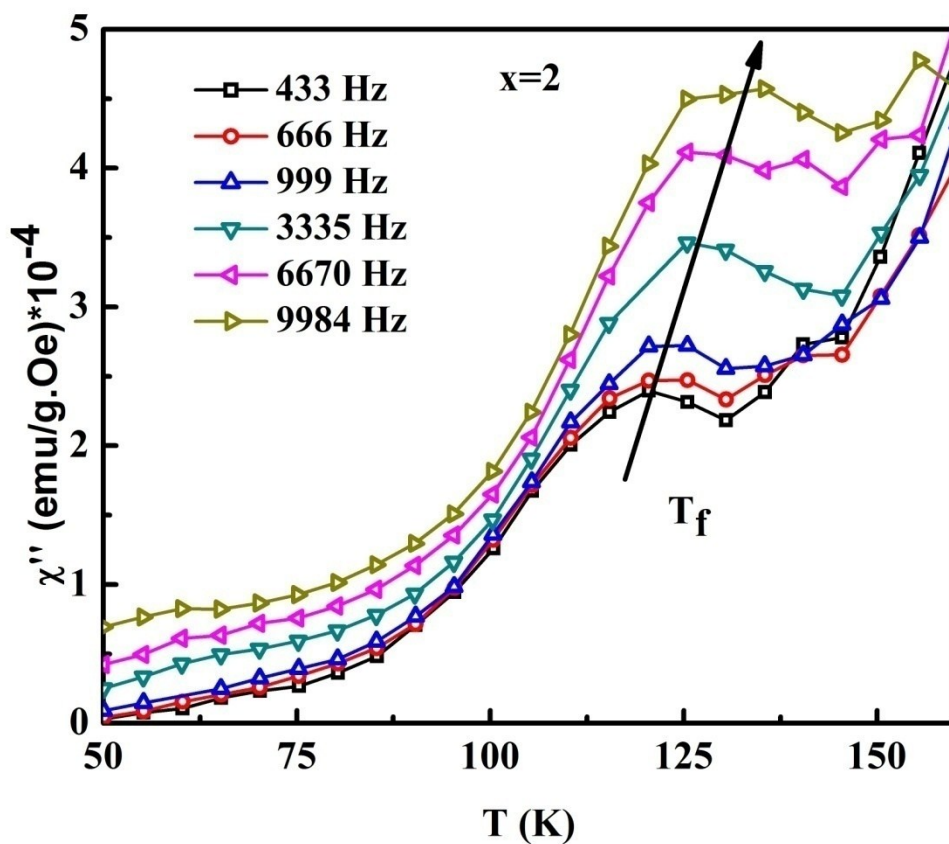

**Fig.1.** Temperature dependence of imaginary part ( $\chi''$ ) of the ac susceptibility measured at different applied frequencies with an ac magnetic field of 1 Oe for  $x=2$  alloy.

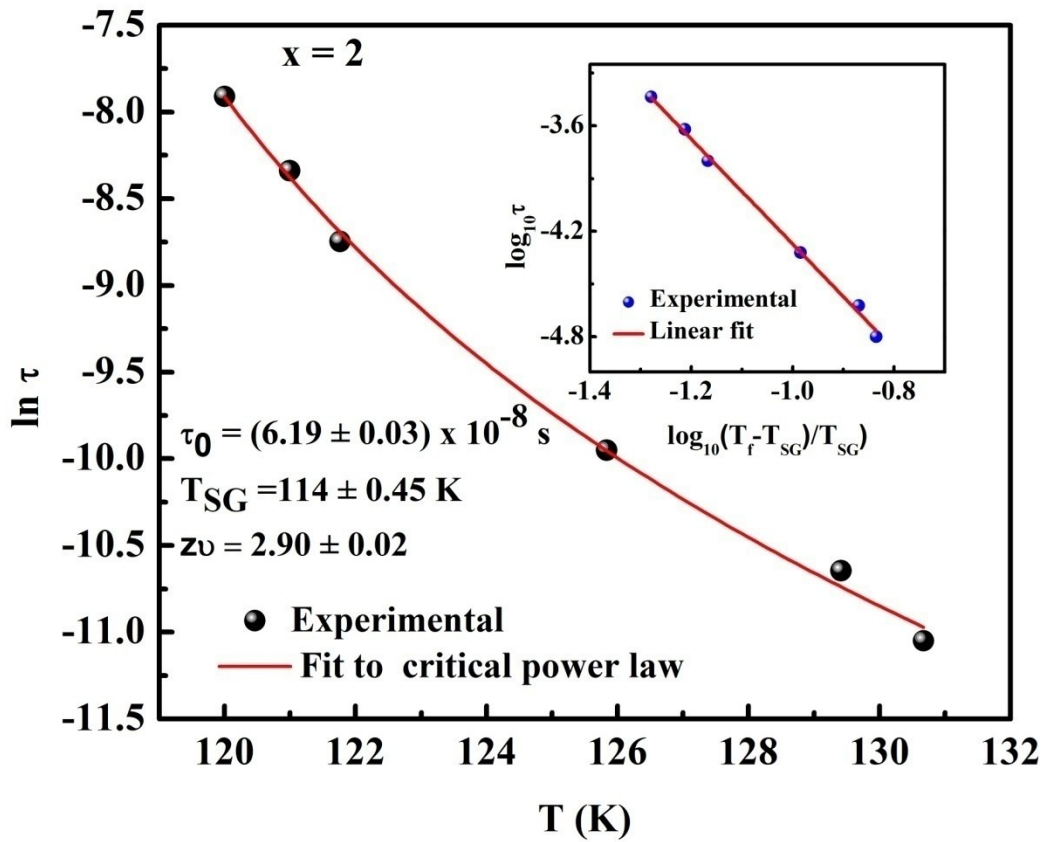

**Fig.2.**  $\ln(\tau)$  vs. maximum spin freezing temperature ( $T$ ) fitted to the critical power law. Inset shows the variation of  $\log_{10}\tau$  with  $\log_{10}((T_f - T_{SG})/T_{SG})$  for  $x=2$  alloy. The solid line represents the linear fit to the experimental data.

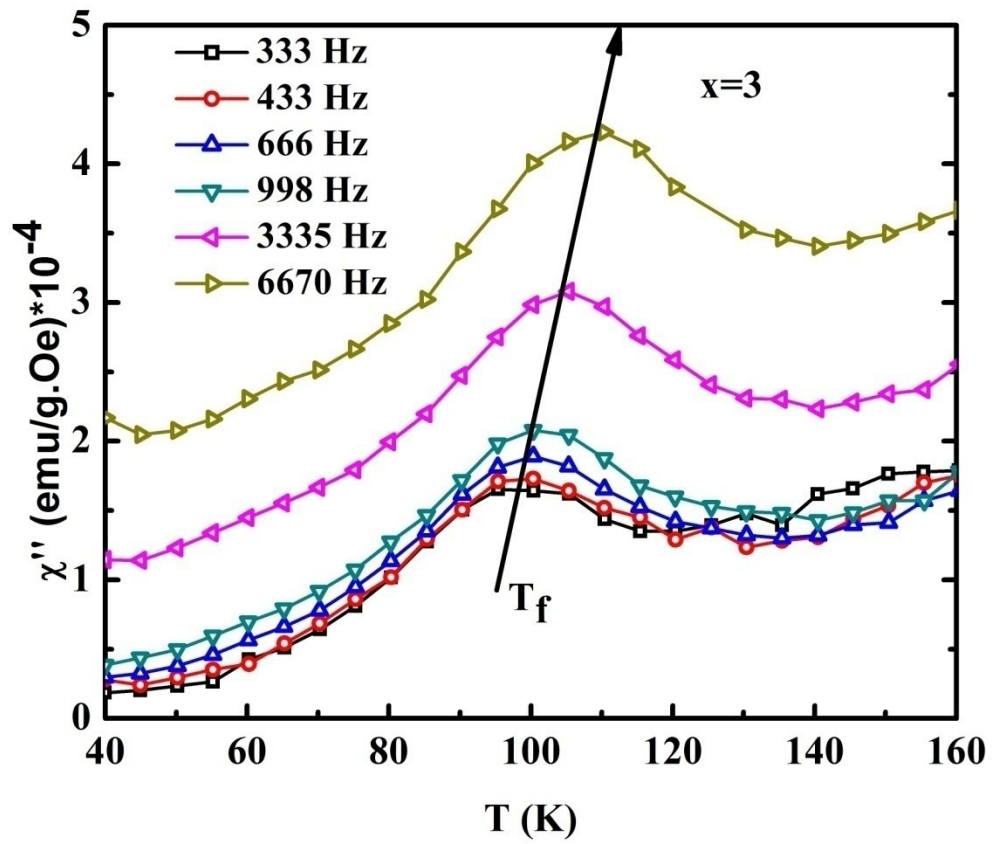

**Fig.3.** Temperature dependence of imaginary part ( $\chi''$ ) of the ac susceptibility measured at different applied frequencies with an ac magnetic field of 1 Oe for x=3 alloy.

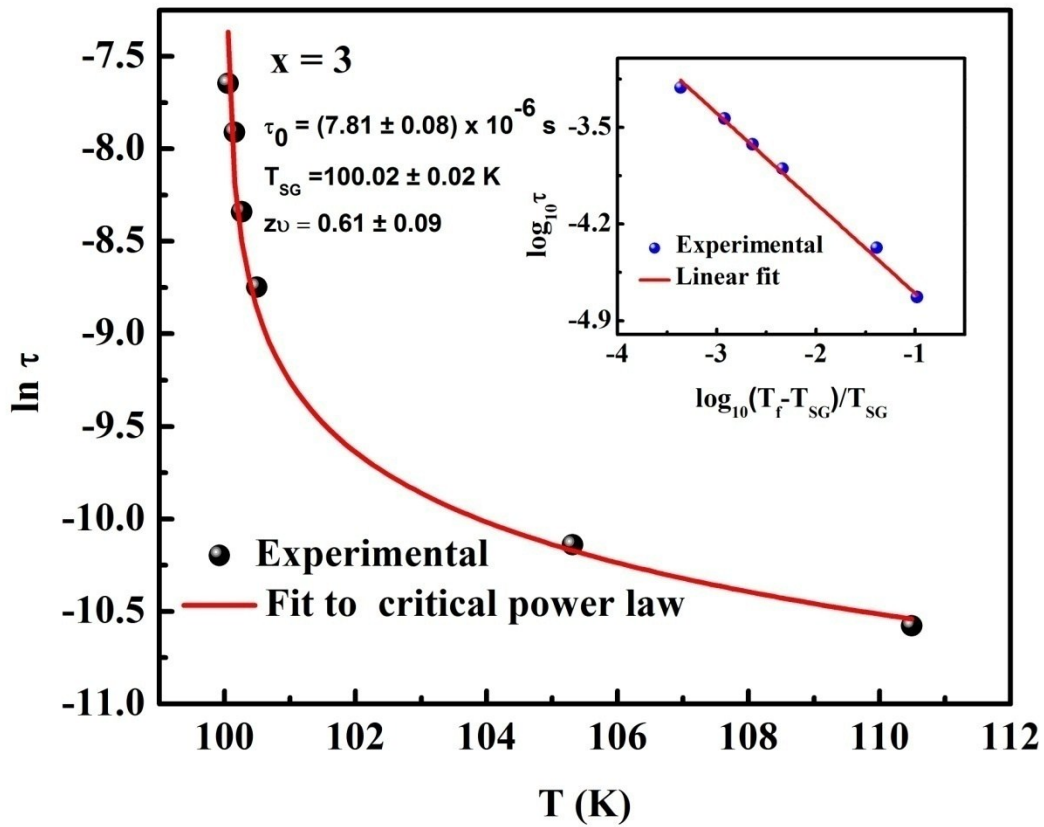

**Fig.4.**  $\ln(\tau)$  vs. maximum spin freezing temperature ( $T$ ) fitted to the critical power law. Inset shows the variation of  $\log_{10}\tau$  with  $\log_{10}((T_f - T_{SG})/T_{SG})$  for  $x=3$  alloy. The solid line represents the linear fit to the experimental data.
